# Supplementary material
Source: MDPI journal article supplement (https://www.mdpi.com/2220-9964/7/2/61)
Supplement: s1 [file s1]

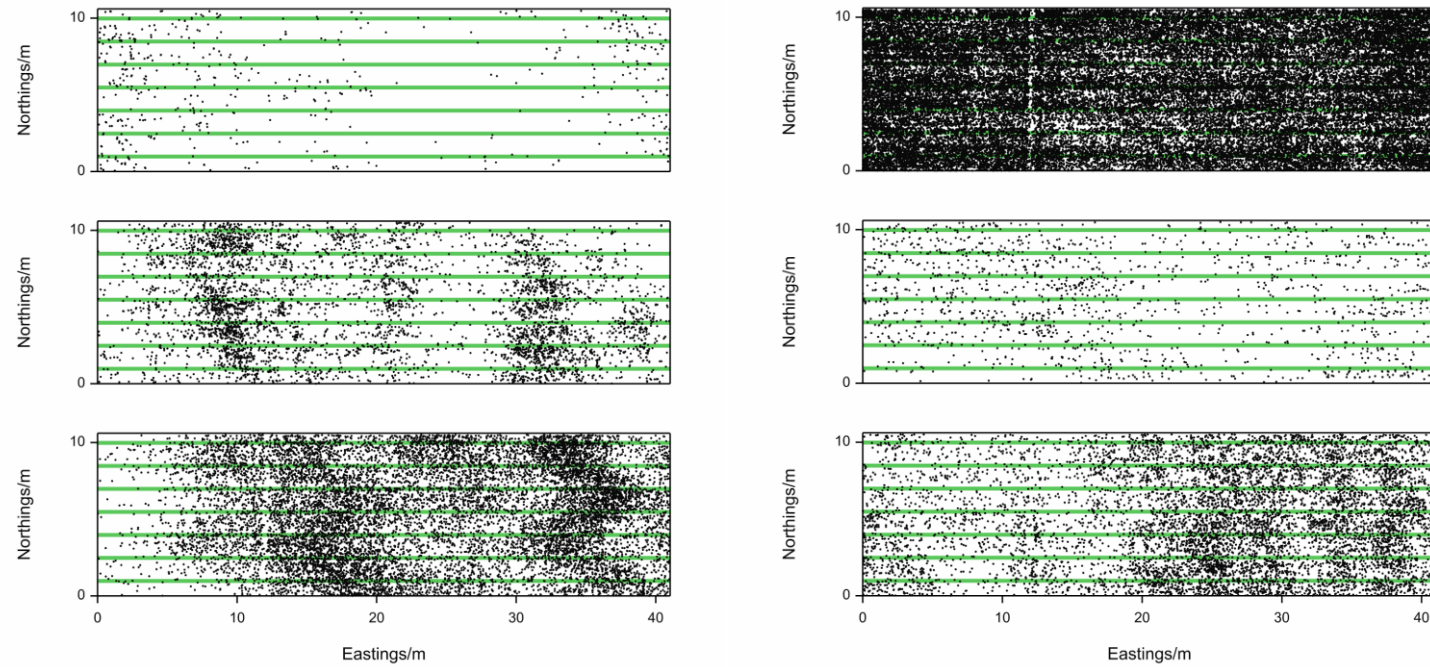

**Figure S1.** Positions of all seedlings of the six weed species and the wheel tracks (green strips). Left side from top to bottom: nutsedge, johnsongrass and velvetleaf; right side from top to bottom: thornapple, nightshade and cocklebur.
